# Supplementary material
Source: PubMed Central journal article supplement (PMC3421879)
Supplement: AAC.06244-11_zac999101217so1.pdf [file AAC.06244-11_zac999101217so1.pdf]

# **Pharmacological characterization, structural studies, and *in vivo* Activity of Anti-Chagas Disease Lead Compounds Derived from Tipifarnib**

## **Supplementary Material**

Frederick S. Buckner<sup>1\*</sup>, Maria Terezinha Bahia<sup>2</sup>, Praveen Kumar Suryadevara<sup>3</sup>, Karen L. White<sup>4</sup>, David M. Shackleford<sup>4</sup>, Naveen Kumar Chennamaneni<sup>3</sup>, Matthew Hulverson<sup>1</sup>, Joy Laydbak<sup>1</sup>, Eric Chatelain<sup>5</sup>, Ivan Scandale<sup>5</sup>, Christophe L.M.J. Verlinde<sup>6</sup>, Susan A. Charman<sup>4</sup>, Galina I. Lepesheva<sup>7</sup>, and Michael H. Gelb<sup>3,6</sup>.

<sup>1</sup>Department of Medicine, <sup>3</sup>Department of Chemistry, and <sup>6</sup>Department of Biochemistry, University of Washington, Seattle, WA USA

<sup>2</sup>Department of Biological Sciences, Federal University of Ouro Preto, Ouro Preto, MG, Brazil

<sup>4</sup>Center for Drug Candidate Optimisation, Monash Institute of Pharmaceutical Sciences, Monash University, Parkville, Victoria, Australia

<sup>5</sup>Drugs for Neglected Diseases Initiative, Geneva, Switzerland

<sup>7</sup>Department of Biochemistry, School of Medicine, Vanderbilt University, Nashville, TN USA

## **Contents**

- 1. Table S1**
- 2. Figure S1**
- 3. Figure S2**

Supplemental Table 1. Data collection and refinement statistics

| <i>T. brucei</i> CYP51-JKF complex (PDB code 3TIK)     |                              |
|--------------------------------------------------------|------------------------------|
| <b>Data collection</b>                                 |                              |
| Wavelength, Å                                          | 0.979                        |
| Space group                                            | P1                           |
| Cell dimensions                                        |                              |
| a, b, c, Å                                             | 59.7, 79.7, 117.5            |
| $\alpha$ , $\beta$ , $\gamma$ , °                      | 74.5, 81.6, 68.1             |
| Molecules per asymmetric unit                          | 4                            |
| Solvent content, %                                     | 48                           |
| Resolution (last shell), Å                             | 30.0 2.05(2.09-2.05)         |
| R <sub>merge</sub> (last shell)                        | 0.049(0.595)                 |
| I/ $\sigma$ (last shell)                               | 43.6 (2.8)                   |
| Completeness (last shell), %                           | 99.7 (99.6)                  |
| Redundancy (last shell)                                | 6.0 (5.9)                    |
| <b>Refinement</b>                                      |                              |
| Resolution, Å                                          | 50.0-2.05                    |
| R-factor                                               | 0.186                        |
| R-free                                                 | 0.243                        |
| Reflections used                                       | 115222                       |
| Test set size, %                                       | 5.0                          |
| Rms deviations from ideal geometry                     |                              |
| Bond lengths, Å                                        | 0.009                        |
| Bond angles, °                                         | 1.13                         |
| Ramachandran plot                                      |                              |
| Residues in favorable regions                          | 99.7%                        |
| Residues in allowed regions                            | 100%                         |
| Outliers                                               | 0%                           |
| <b>Model</b>                                           |                              |
| Total number of atoms                                  | 14916                        |
| Residues per chain (average B-factor, Å <sup>2</sup> ) |                              |
| protein                                                | 450 / 450 / 450 / 450 (49.7) |
| heme                                                   | 1 / 1 / 1 / 1 (34.0)         |
| JKF (inhibitor)                                        | 1 / 1 / 1 / 1 (45.3)         |
| Water                                                  | 295 (57.6)                   |

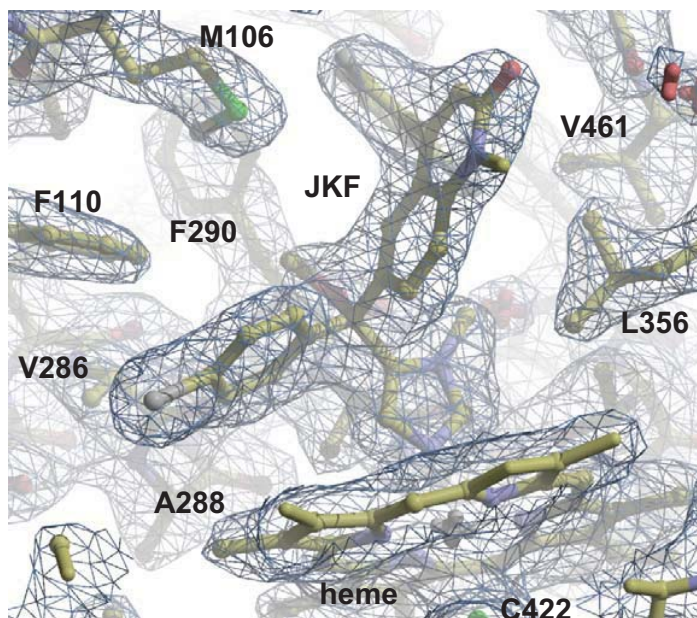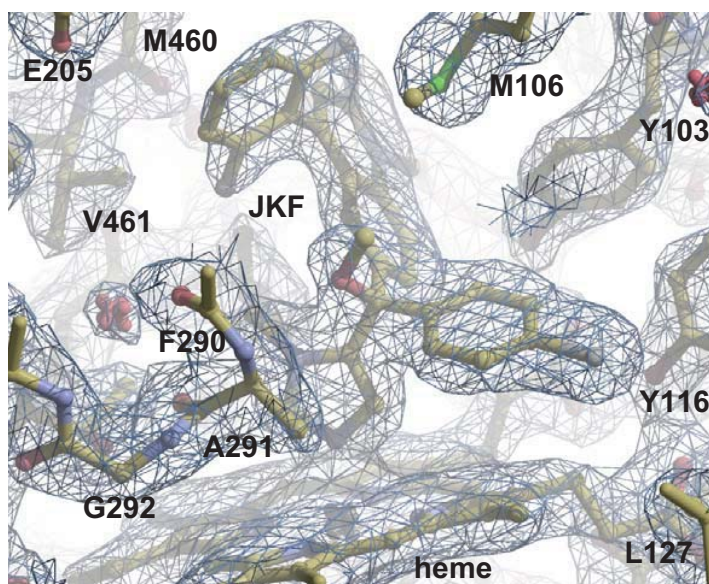

**Supplemental Figure 1. 2Fo-Fc electron density map for JKF in the active site of *T. brucei* CYP51 contoured at 1.5  $\sigma$ . a and b represent opposite views obtained at  $\sim 180^\circ$  rotation of JKF centered on its chiral C-atom around axis Y.**

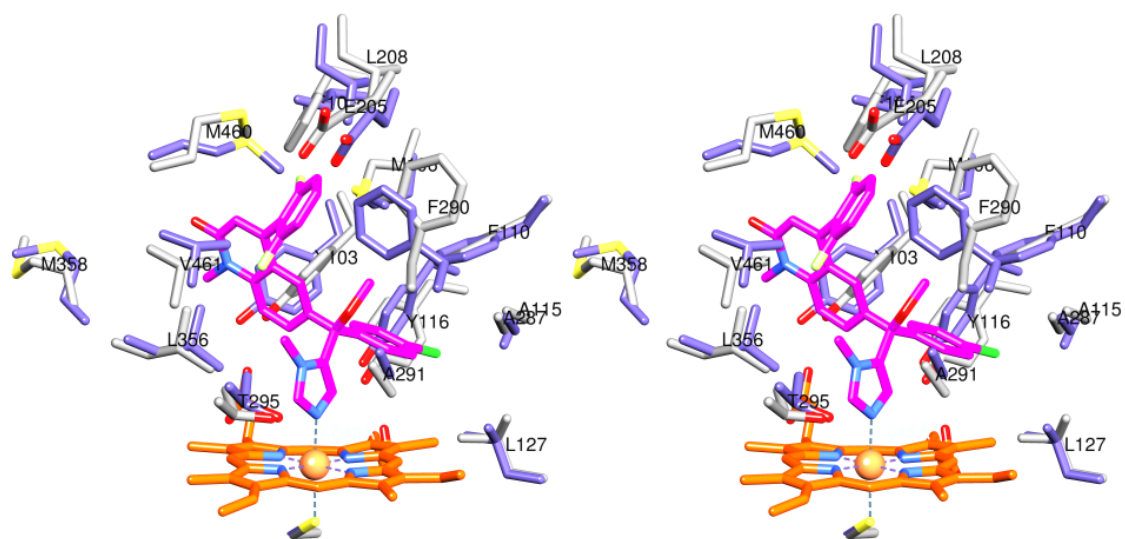

**Supplemental Fig. 2. Stereoview of the CYP51 active site .** Stick model representation. Orientation is approximately the same as in **Fig. 5**. Carbon atoms in the enzymes from *T. cruzi* and *T. brucei* are purple and grey, respectively.
